# Supplementary material for: Dark Matter of Primate Genomes: Satellite DNA Repeats and Their Evolutionary Dynamics
Source: PubMed Central journal article supplement (PMC7767330; doi:10.3390/cells9122714), 2020-12-18
Supplement: cells-09-02714-s001.pdf [file cells-09-02714-s001.pdf]

Supplementary Table S1. SatDNA repeats described in this review.

| Satellite repeat     | Sub-type        | Primate species                                                                                                                                                       | Chromosomal location              | Monomer Size   | Repeat array length  | Reference |
|----------------------|-----------------|-----------------------------------------------------------------------------------------------------------------------------------------------------------------------|-----------------------------------|----------------|----------------------|-----------|
| HSAT                 | HSAT1           | <i>Homo sapiens</i> ,                                                                                                                                                 | Centromere                        | 24 bp          | 566 bp               | [181]     |
|                      | HSAT2           | <i>Cercopithecus pogonias</i> ,                                                                                                                                       | Pericentromere                    | 24 bp          | 1.77 kb              | [223]     |
|                      | HSAT3           | <i>Cercopithecus solatus</i> ,                                                                                                                                        | Pericentromere                    | 24 bp          | 3.6 kb               |           |
|                      | HSAT6           |                                                                                                                                                                       | Centromere                        | -              | 126 bp               | [132]     |
| Non-alphoid satDNA   | SatIII          | <i>H. sapiens</i> ,<br><i>Pan troglodytes</i> ,<br><i>Gorilla beringei</i> ,<br><i>Pongo pygmaeus</i>                                                                 | Pericentromere                    | -              | 156 bp upto - 700 bp | [148,149] |
| OwlRep               | OwlAlp1         | <i>Aotus azarae</i>                                                                                                                                                   | Centromere                        | 184 bp         | -                    | [22,23]   |
|                      | OwlAlp2         |                                                                                                                                                                       | Pericentromere                    | 344 bp         | -                    | [22,23]   |
| Beta satellite       | D4Z4            | <i>H. sapiens</i> ,<br><i>Macaca mulatta</i> ,<br><i>Macaca nemestrina</i> ,<br><i>Saimiri sciureus</i> ,<br><i>Chlorocebus sabaesus</i> ,<br><i>Ateles geoffroyi</i> | Acrocentre loci, (10q26 and 4q35) | 3.3-kb         | several kb           | [147]     |
| Microsatellites      | AP74            | <i>H. sapiens</i> ,<br><i>P. troglodytes</i> ,<br><i>Ateles chamek</i> ,<br><i>Ateles belzebuth</i> ,<br><i>Alouatta caraya</i> ,<br><i>Lemur catta</i>               | Telomere/Sub-Telomere             | 126 and 176 bp | -                    | [76,77]   |
|                      | MsH42           | <i>H. sapiens</i>                                                                                                                                                     | q25.1                             | 10 to 100 bp   | 863 bp               | [77]      |
| AS repeat            | Cap-A           | <i>Cebus apella</i>                                                                                                                                                   | Telomere                          | -              | 1500 bp              | [161]     |
|                      | Cap-B           |                                                                                                                                                                       |                                   | -              | 342 bp               |           |
| Higher-order repeats | MarmoSAT        | <i>Callithrix jacchus</i> ,<br><i>Callimico goeldii</i>                                                                                                               | Subtelomere                       | 171 bp         | 338 bp               | [157]     |
| Sex-linked satDNA    | Gamma satellite | <i>H. sapiens</i>                                                                                                                                                     | Pericentromere                    | 3, 9, or 24 kb | 220 bp               | [27,179]  |

Note: The dash “-” denotes the data for this repeat type is unknown.
